# Supplementary material for: In vitro proteasome processing of neo-splicetopes does not predict their presentation in vivo
Source: eLife journal article supplement (doi:10.7554/elife.62019), 2021-04-19
Supplement: supp [file elife-62019-supp-v2.zip]

Archive with 11 entries (11 files):
- elife_poa_e62019_Transparent_Reporting_File.pdf
- elife_poa_e62019_Figure_1_figure_supplement_1.jpg
- elife_poa_e62019_Figure_2_figure_supplement_1.jpg
- elife_poa_e62019_Figure_3_figure_supplement_1.jpg
- elife_poa_e62019_Figure_3_figure_supplement_2.jpg
- elife_poa_e62019_Figure_3_figure_supplement_3.jpg
- elife_poa_e62019_Figure_3_figure_supplement_4.jpg
- elife_poa_e62019_Figure_3_figure_supplement_5.jpg
- elife_poa_e62019_Figure_4_figure_supplement_1.jpg
- elife_poa_e62019_Supplementary_file_1.docx
- elife_poa_e62019_Supplementary_file_2.docx
