# Supplementary material for: In vitro proteasome processing of neo-splicetopes does not predict their presentation in vivo
Source: eLife journal article supplement (doi:10.7554/elife.62019), 2021-04-19
Supplement: supp [file elife-62019-supp-v2.zip › elife_poa_e62019_Supplementary_file_2.docx]

**Faulty peptides identified within the KRASG12V****polypeptide substrates**

| **Faulty peptides identified within the KRASG12V2-14****polypeptide substrate**  **T E Y K L V V _ G A V G V 5-8/10-14 sp1**  **E Y K L V V _ G A V G V**  **T E Y K L V V V G _ V G V 5-9/11-14 sp2**  **T E Y K L V V V _ A V G V 5-10/12-14 sp4**  **Faulty peptides identified within the KRASG12V2-21****polypeptide substrate**  **T E Y K L V V _ G A V G V V G S K S A L T I 5-8/10-14 sp1**  **K L V V _ G A V G V V G S K S A L T I**  **K L V V _ G A V G V V G S K S A**  **T E Y K L V V V G _ V G V V G S K S A L T I 5-10/12-14 sp4**  **K L V V V G _ V G V V G S K S A**  **K L V V V G _ V G V V G S K S A L** |
| --- |
