# Supplementary figures and images for: In vitro proteasome processing of neo-splicetopes does not predict their presentation in vivo
Source: eLife journal article supplement (doi:10.7554/elife.62019), 2021-04-19

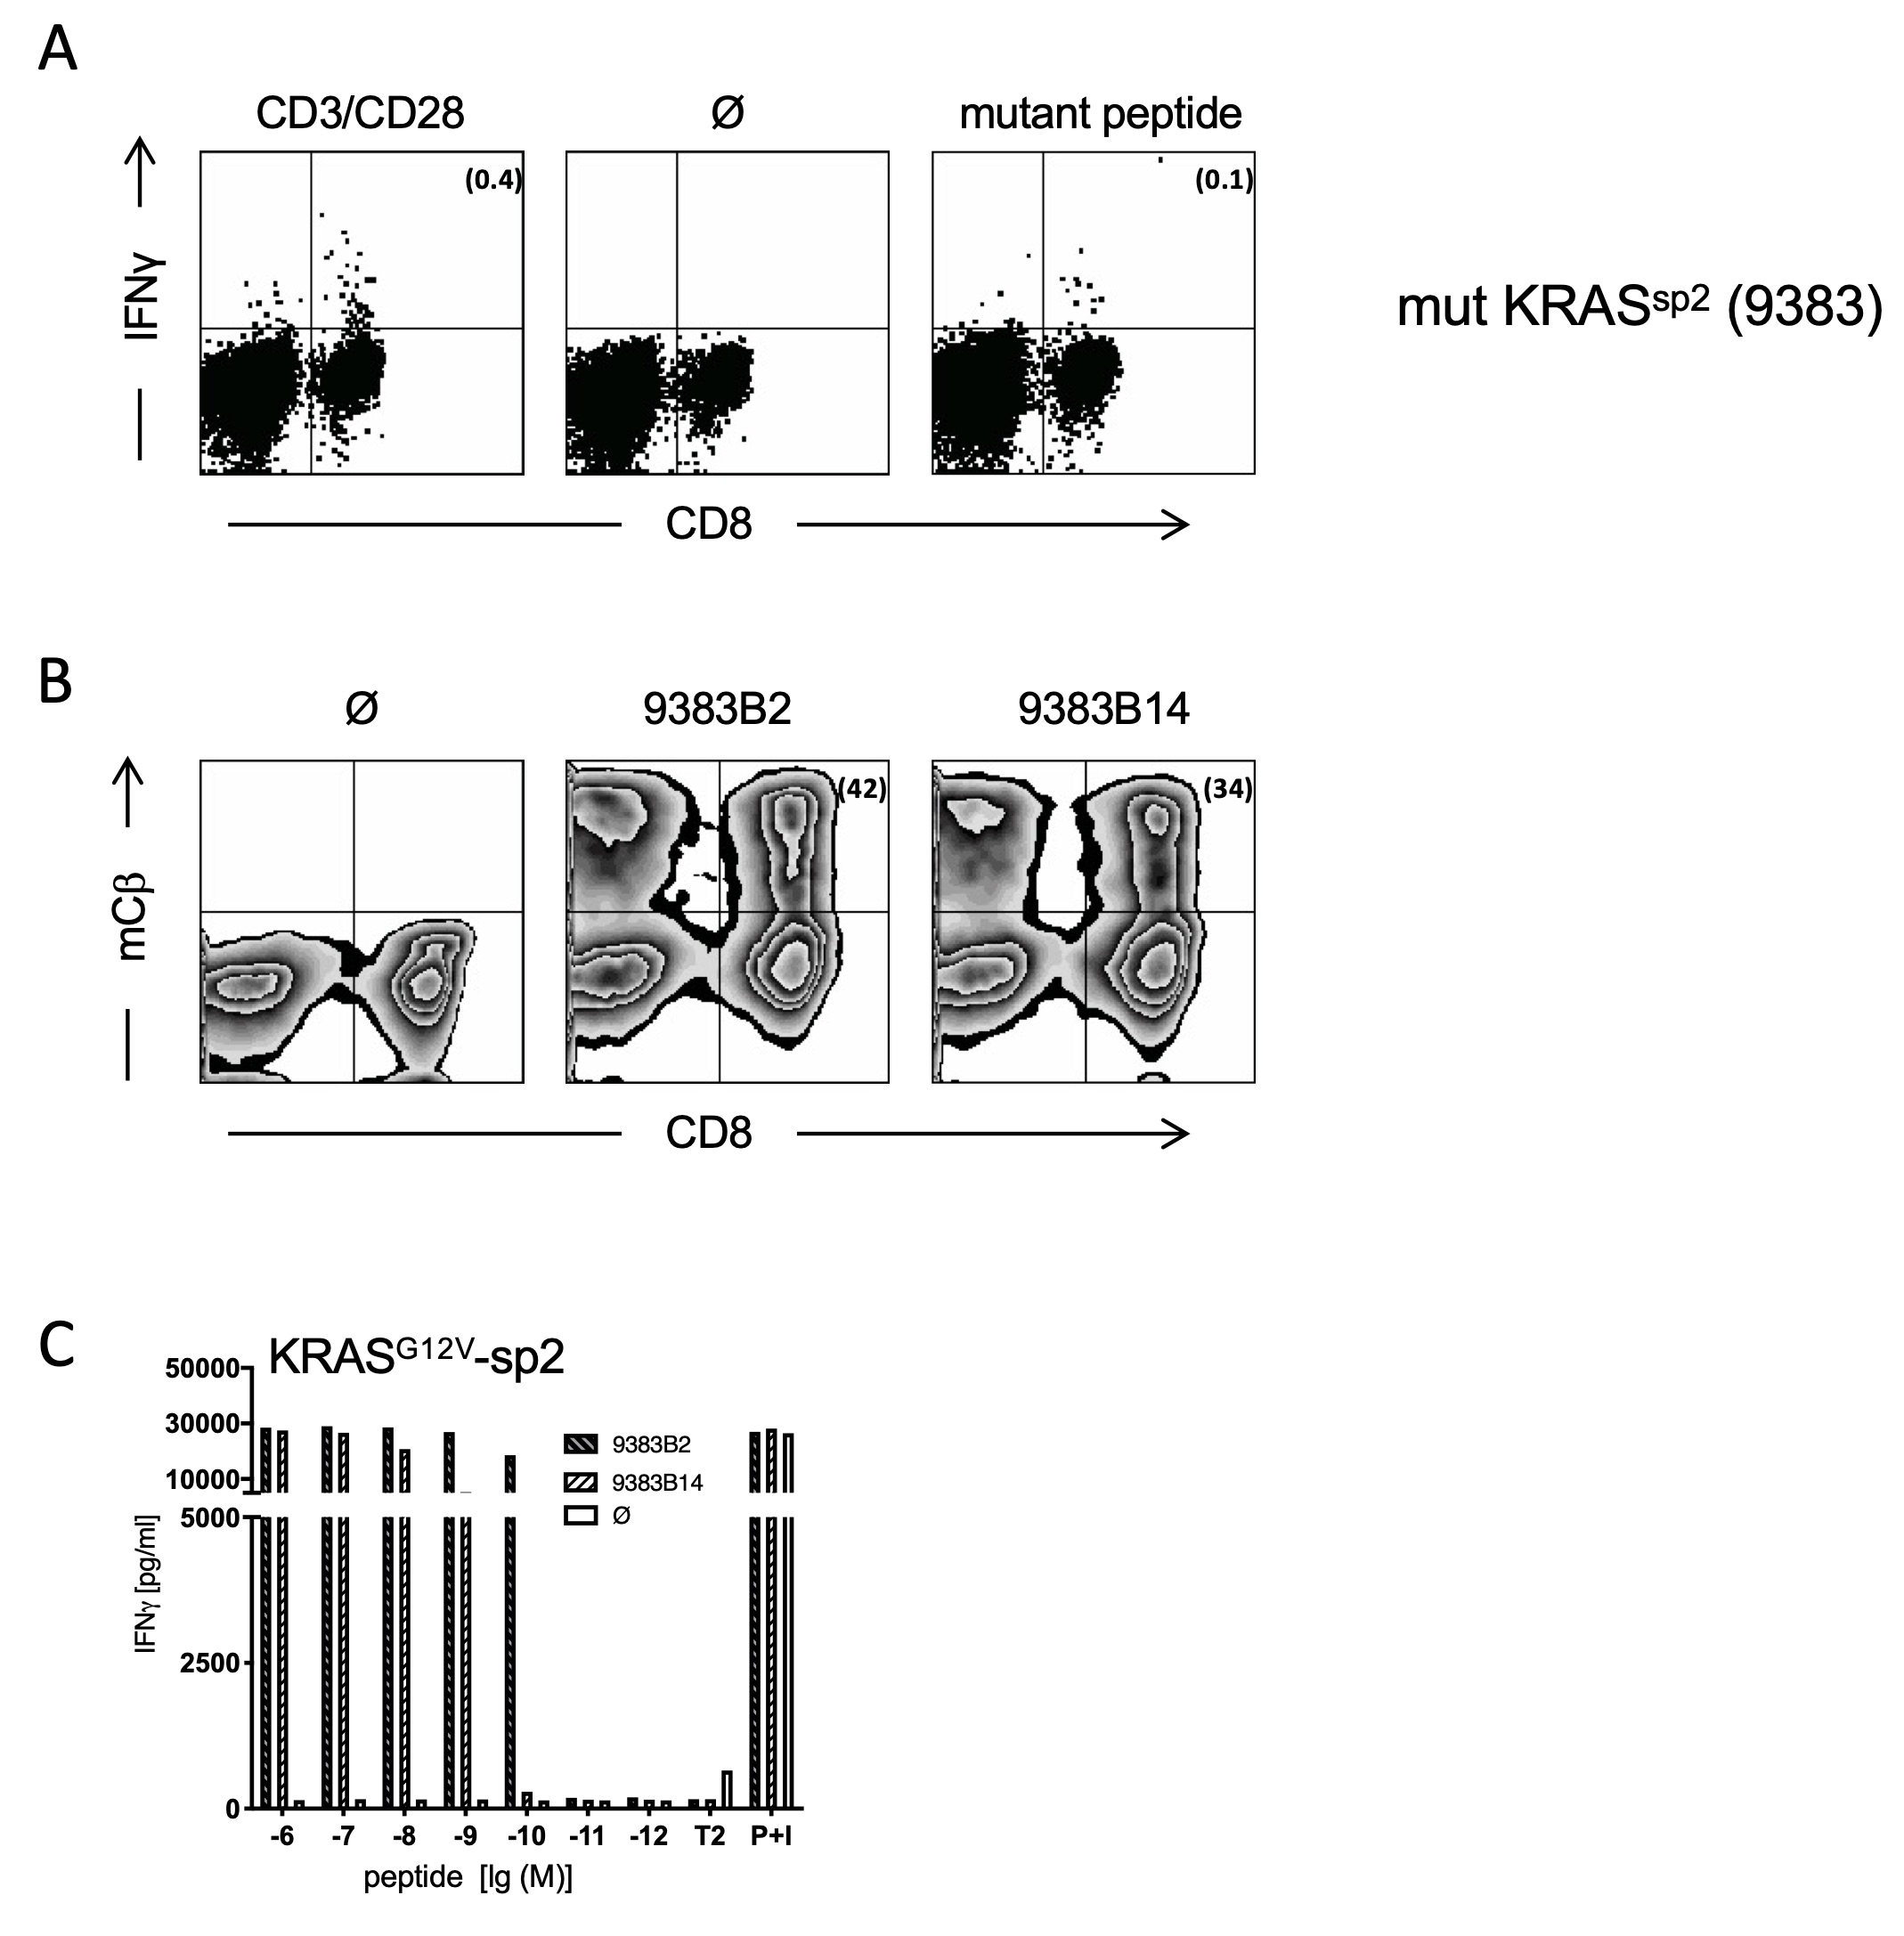

Supplement: supp [file elife-62019-supp-v2.zip › elife_poa_e62019_Figure_1_figure_supplement_1.jpg]

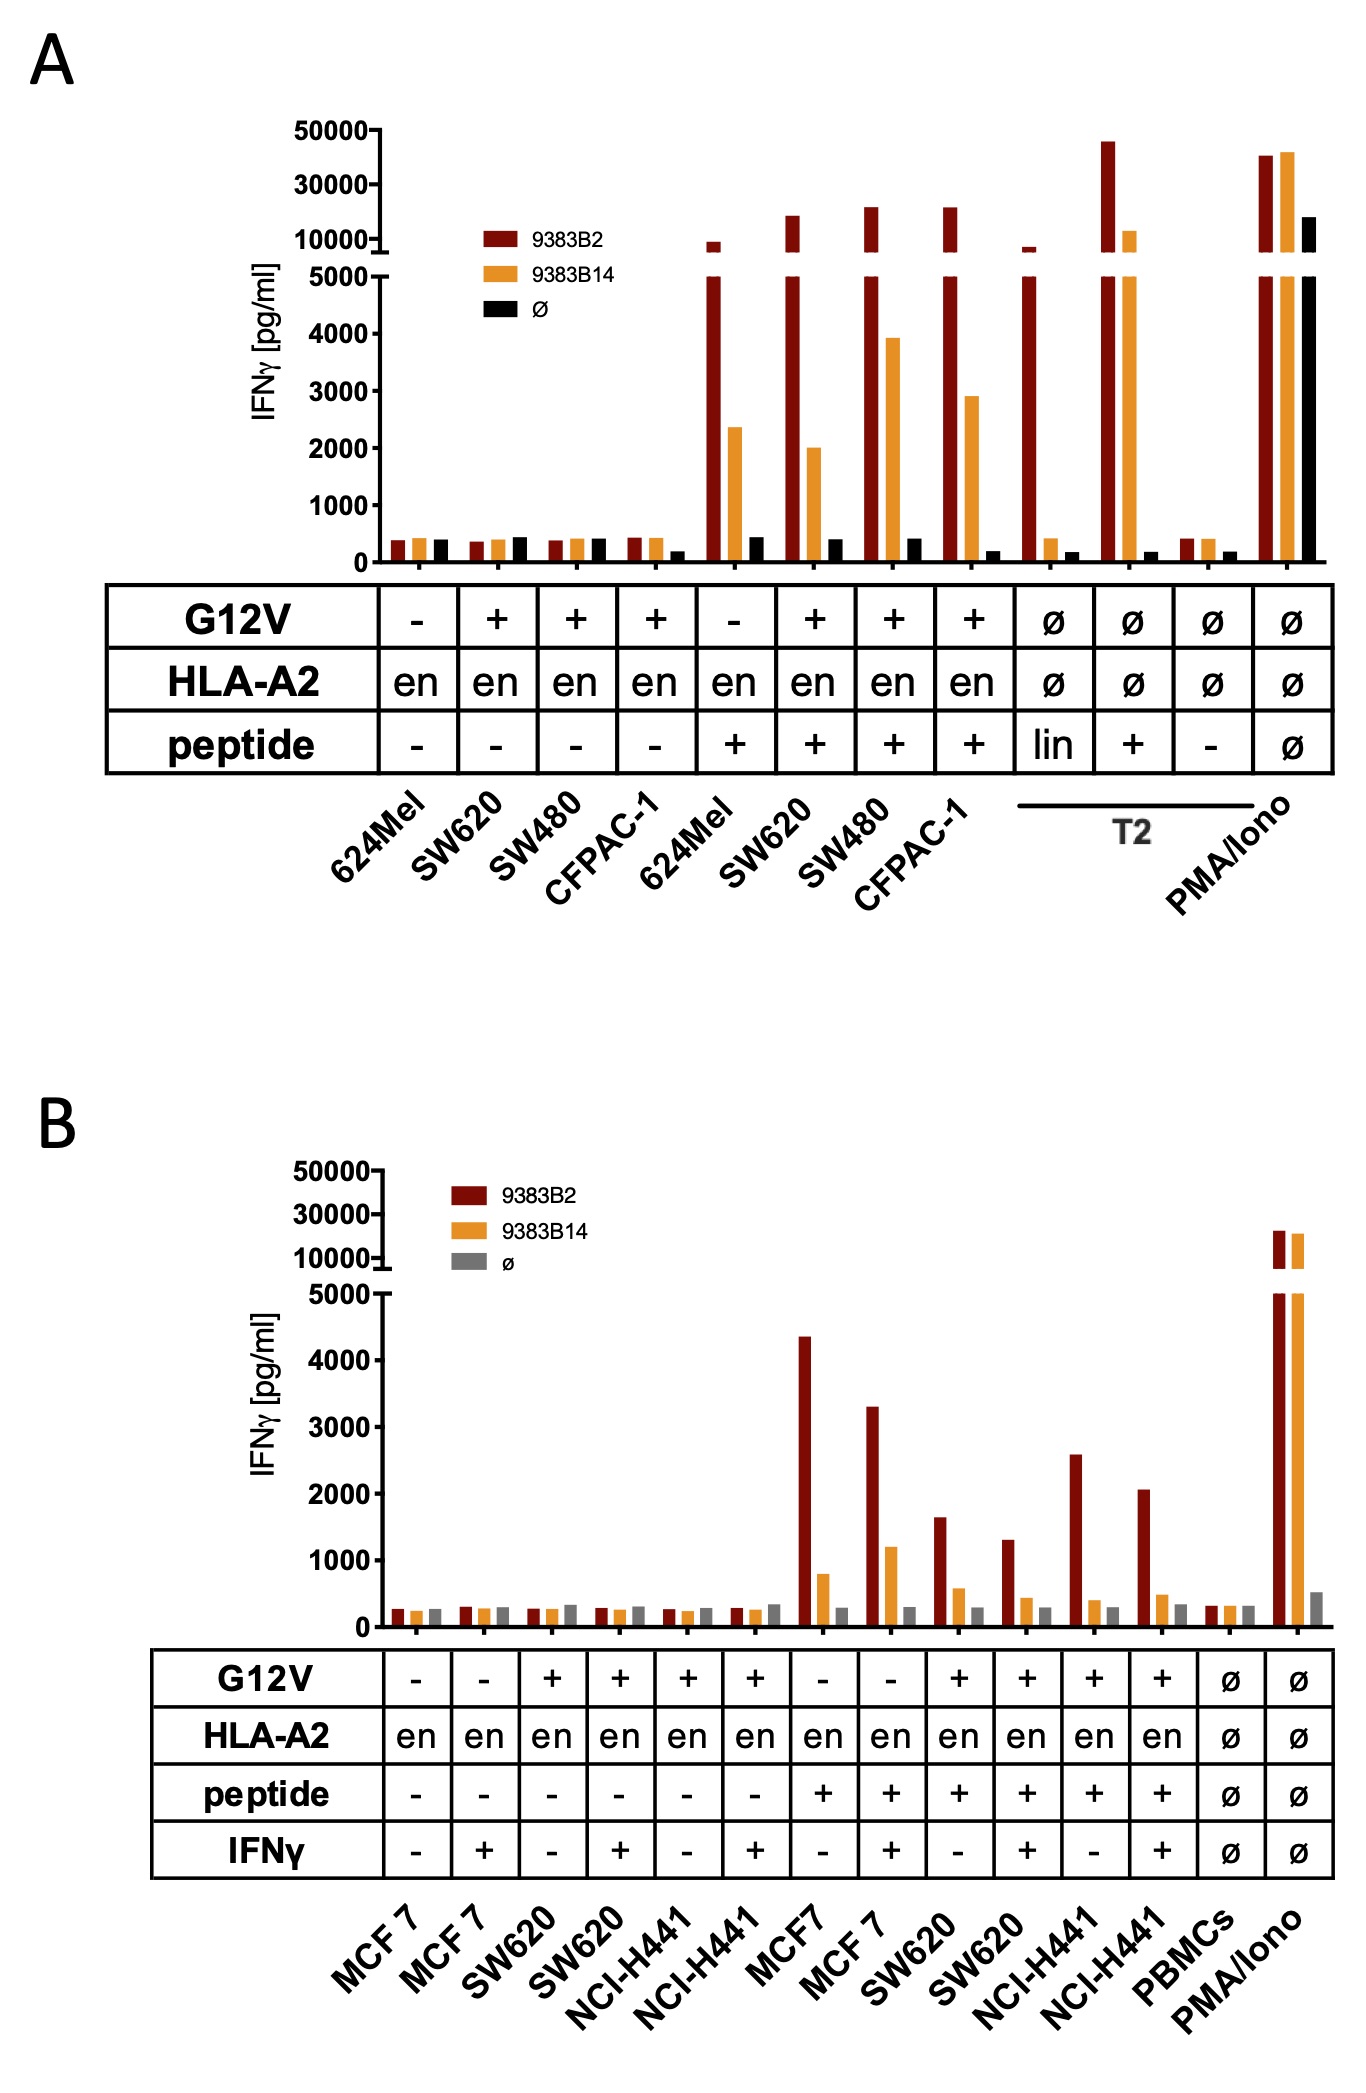

Supplement: supp [file elife-62019-supp-v2.zip › elife_poa_e62019_Figure_2_figure_supplement_1.jpg]

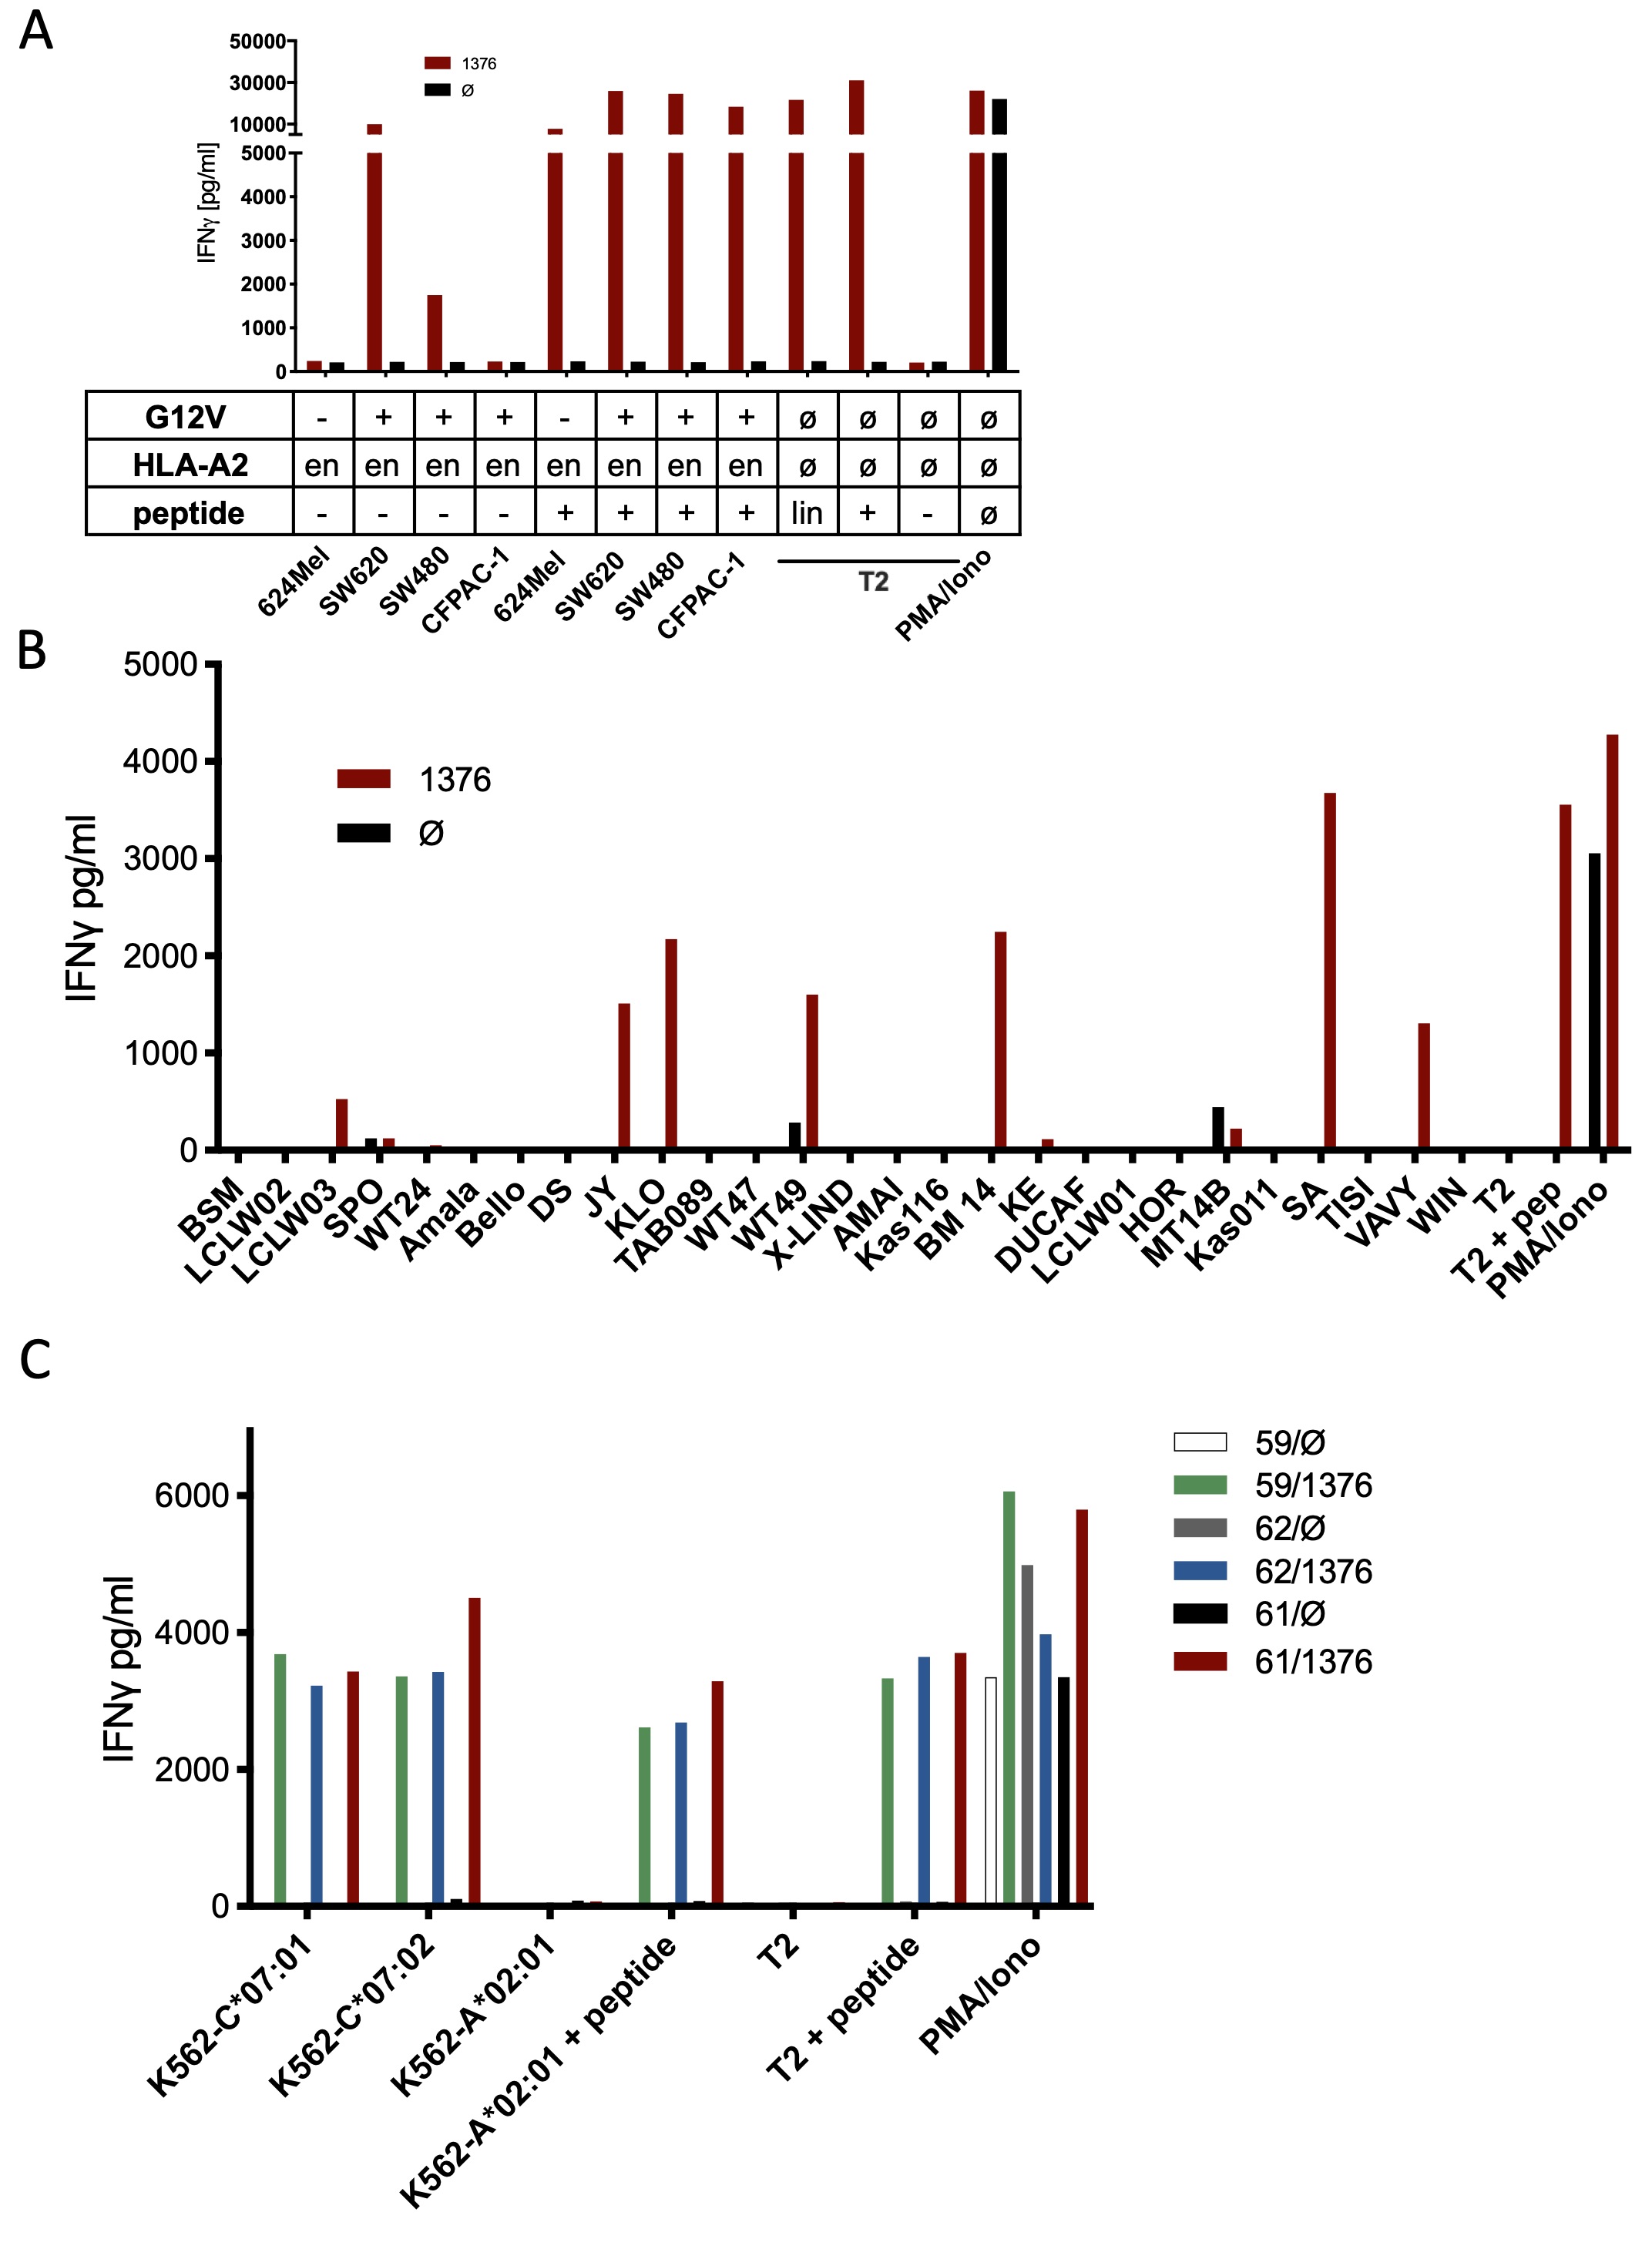

Supplement: supp [file elife-62019-supp-v2.zip › elife_poa_e62019_Figure_3_figure_supplement_1.jpg]

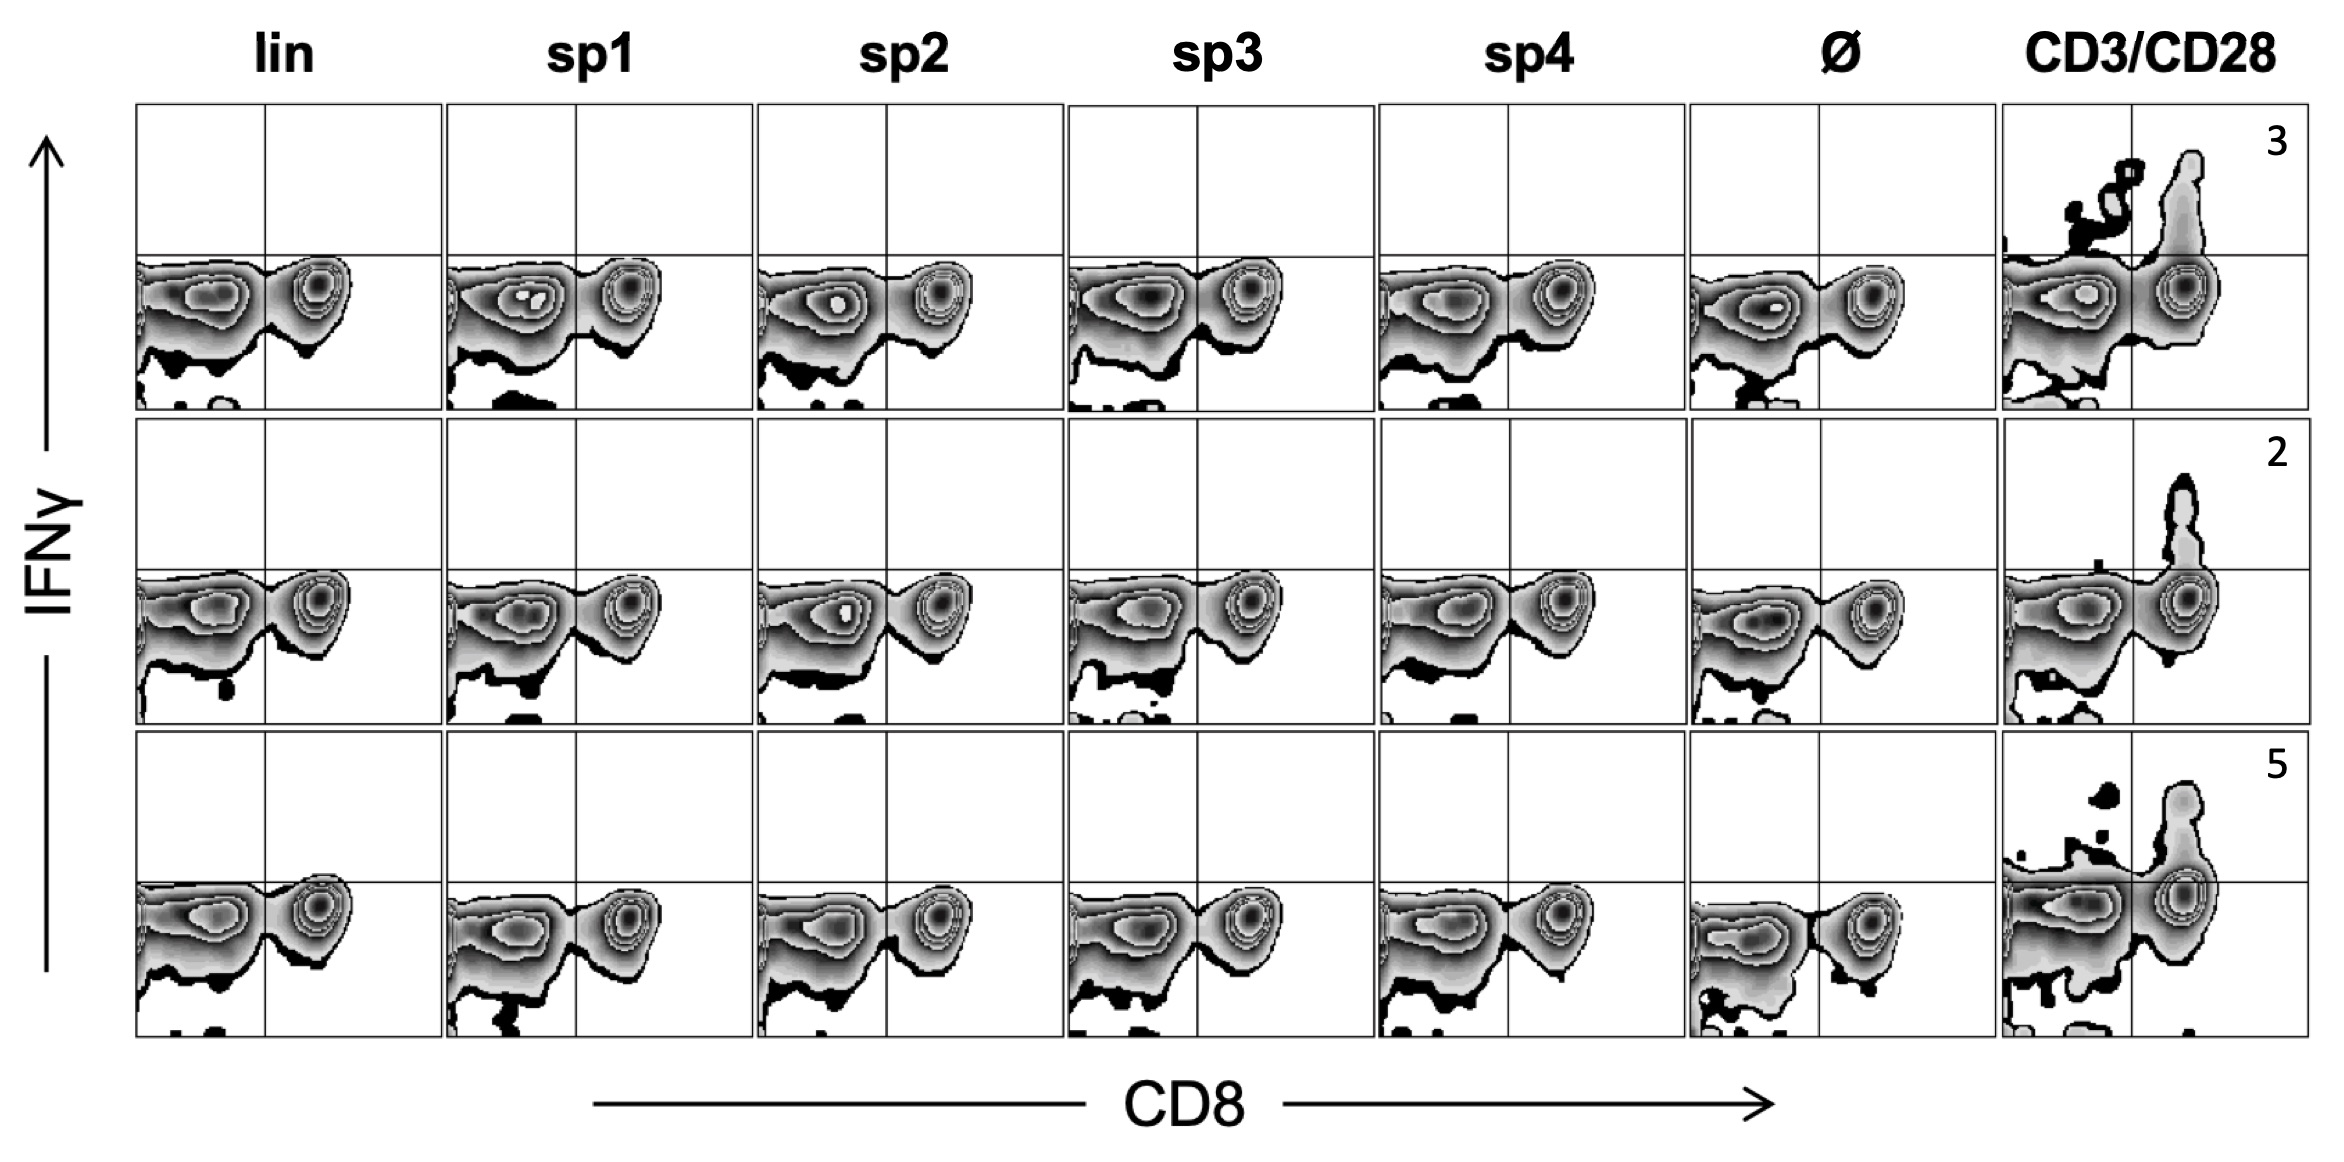

Supplement: supp [file elife-62019-supp-v2.zip › elife_poa_e62019_Figure_3_figure_supplement_2.jpg]

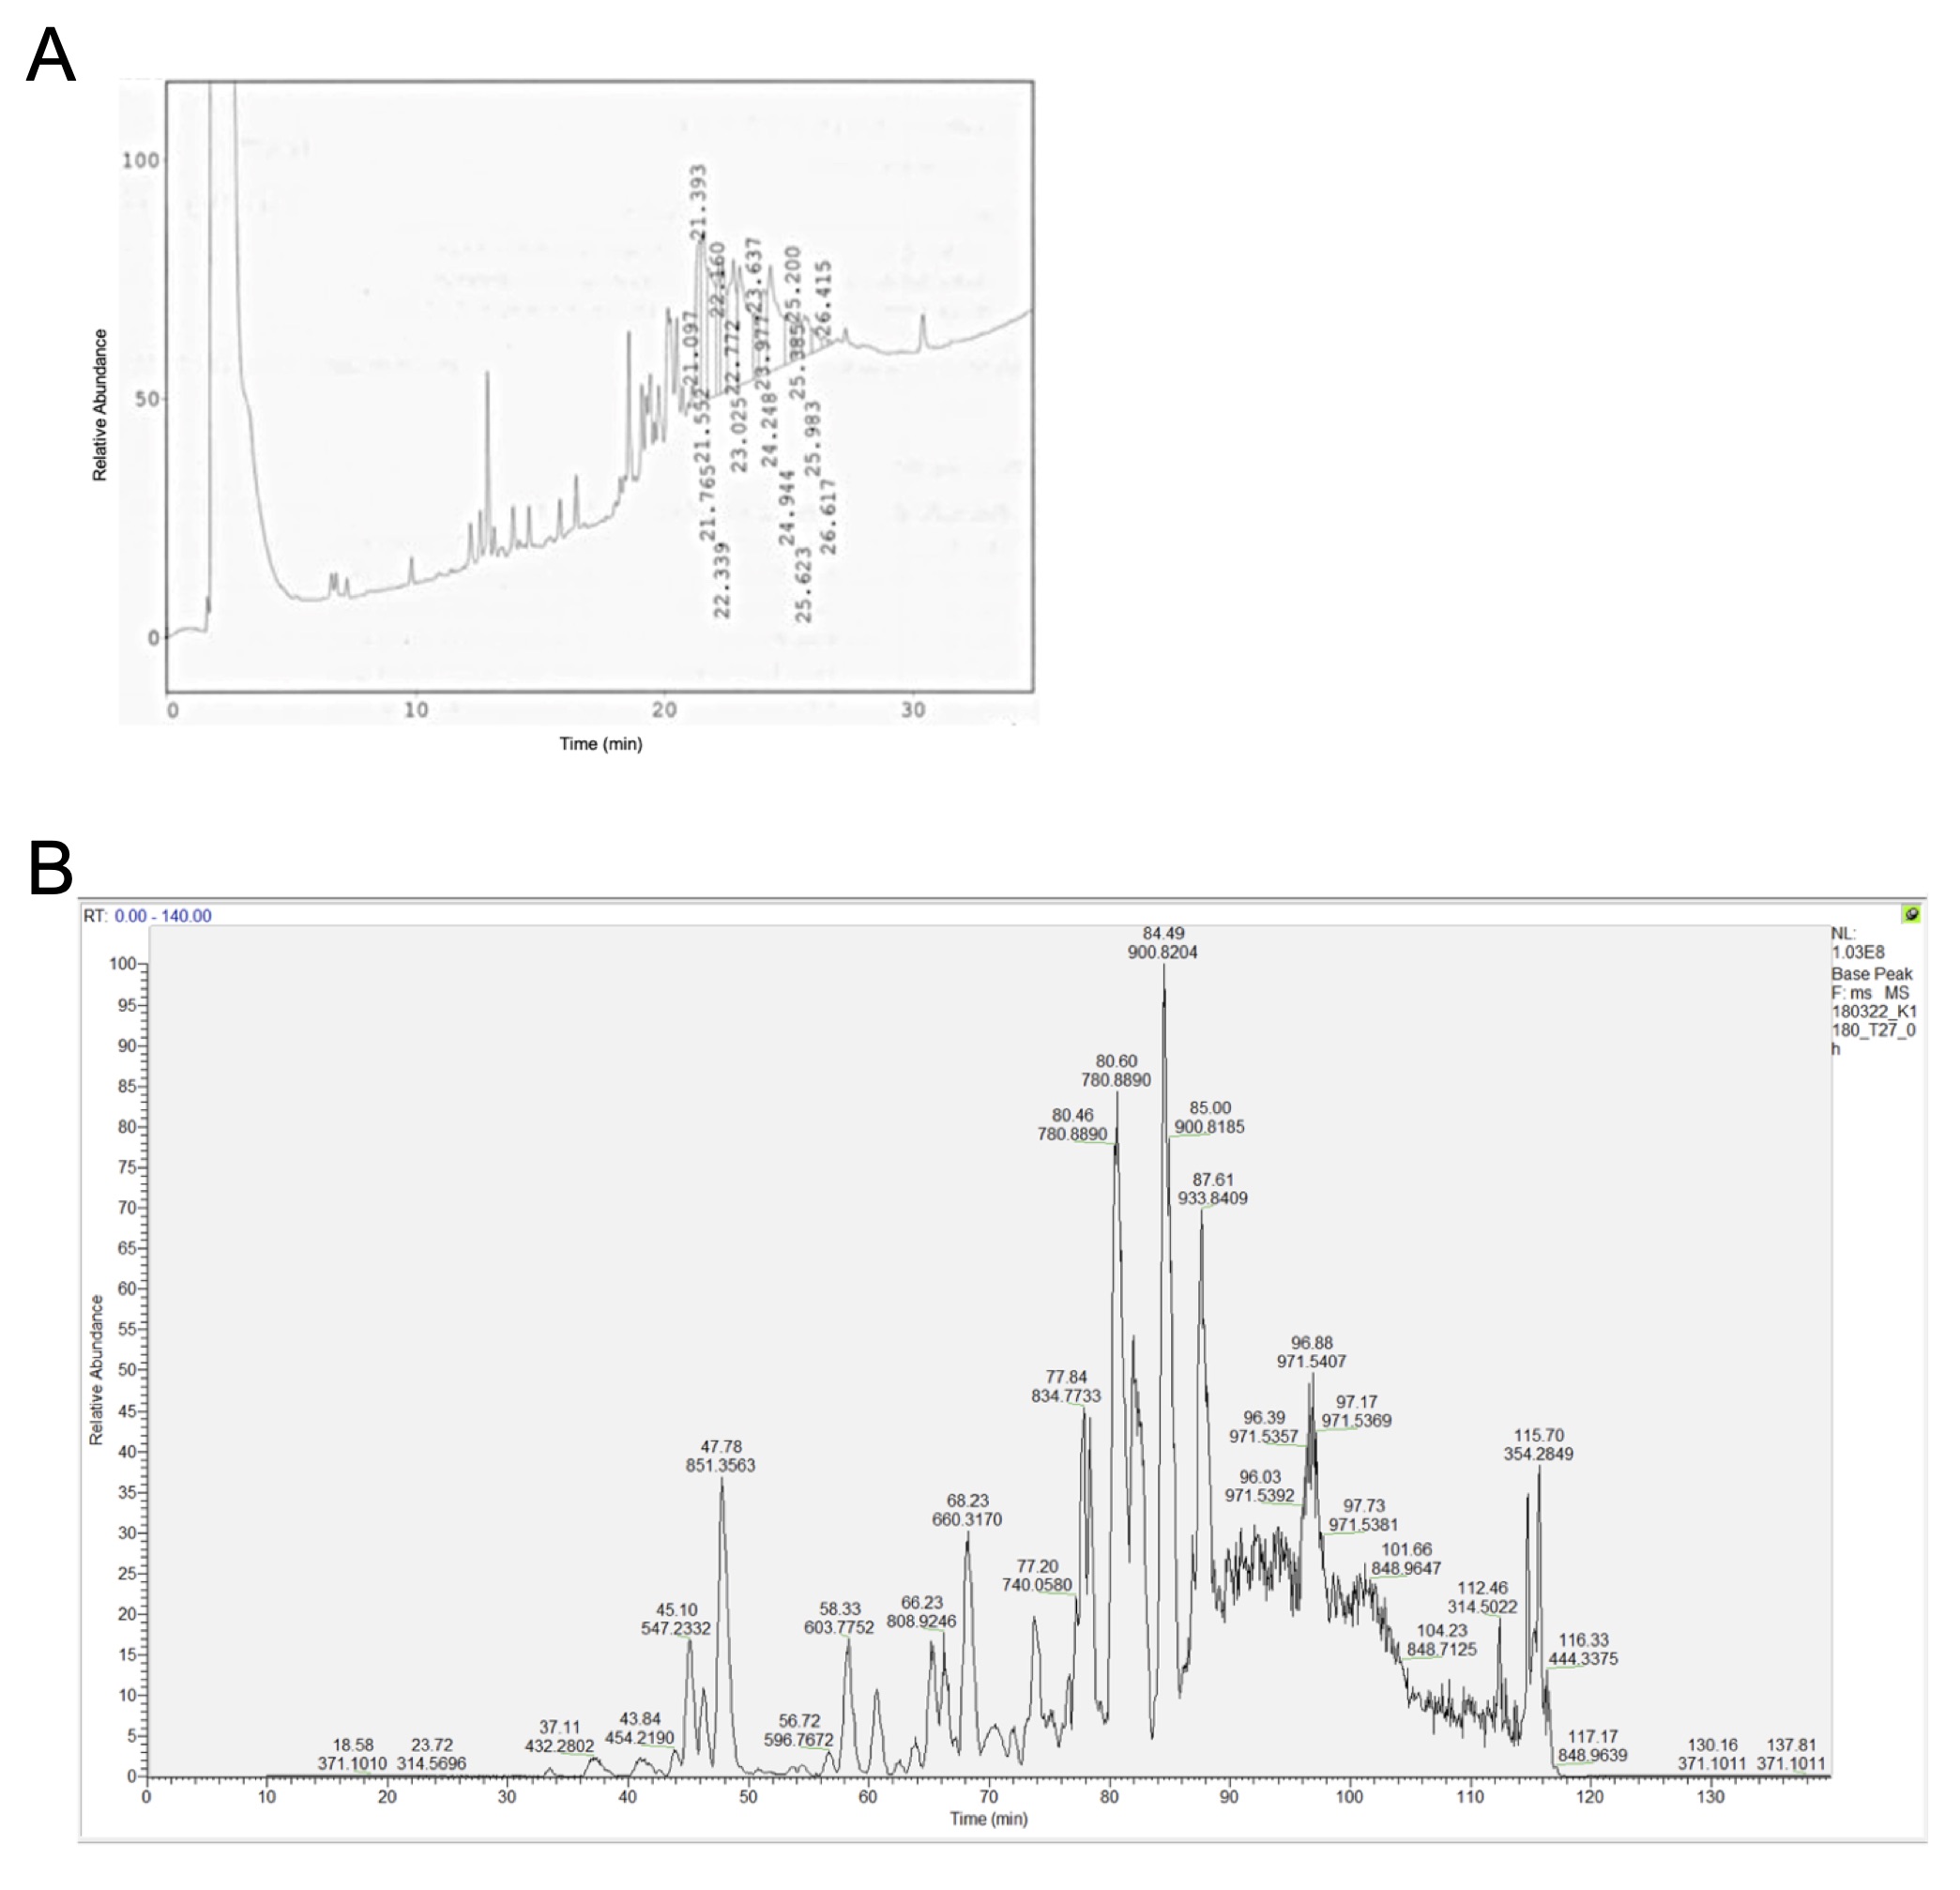

Supplement: supp [file elife-62019-supp-v2.zip › elife_poa_e62019_Figure_3_figure_supplement_3.jpg]

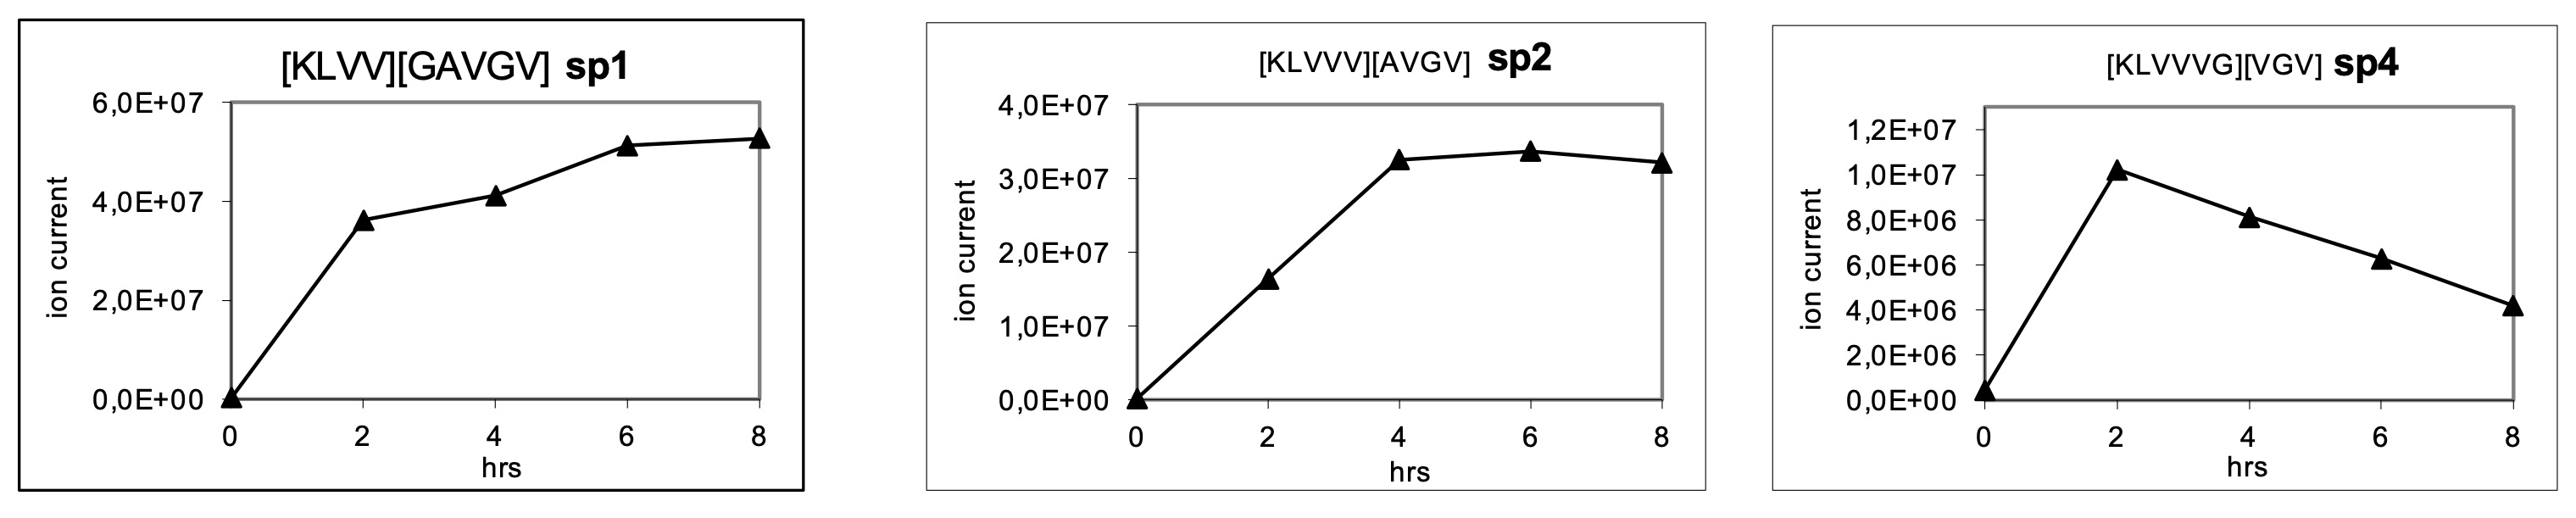

Supplement: supp [file elife-62019-supp-v2.zip › elife_poa_e62019_Figure_3_figure_supplement_4.jpg]

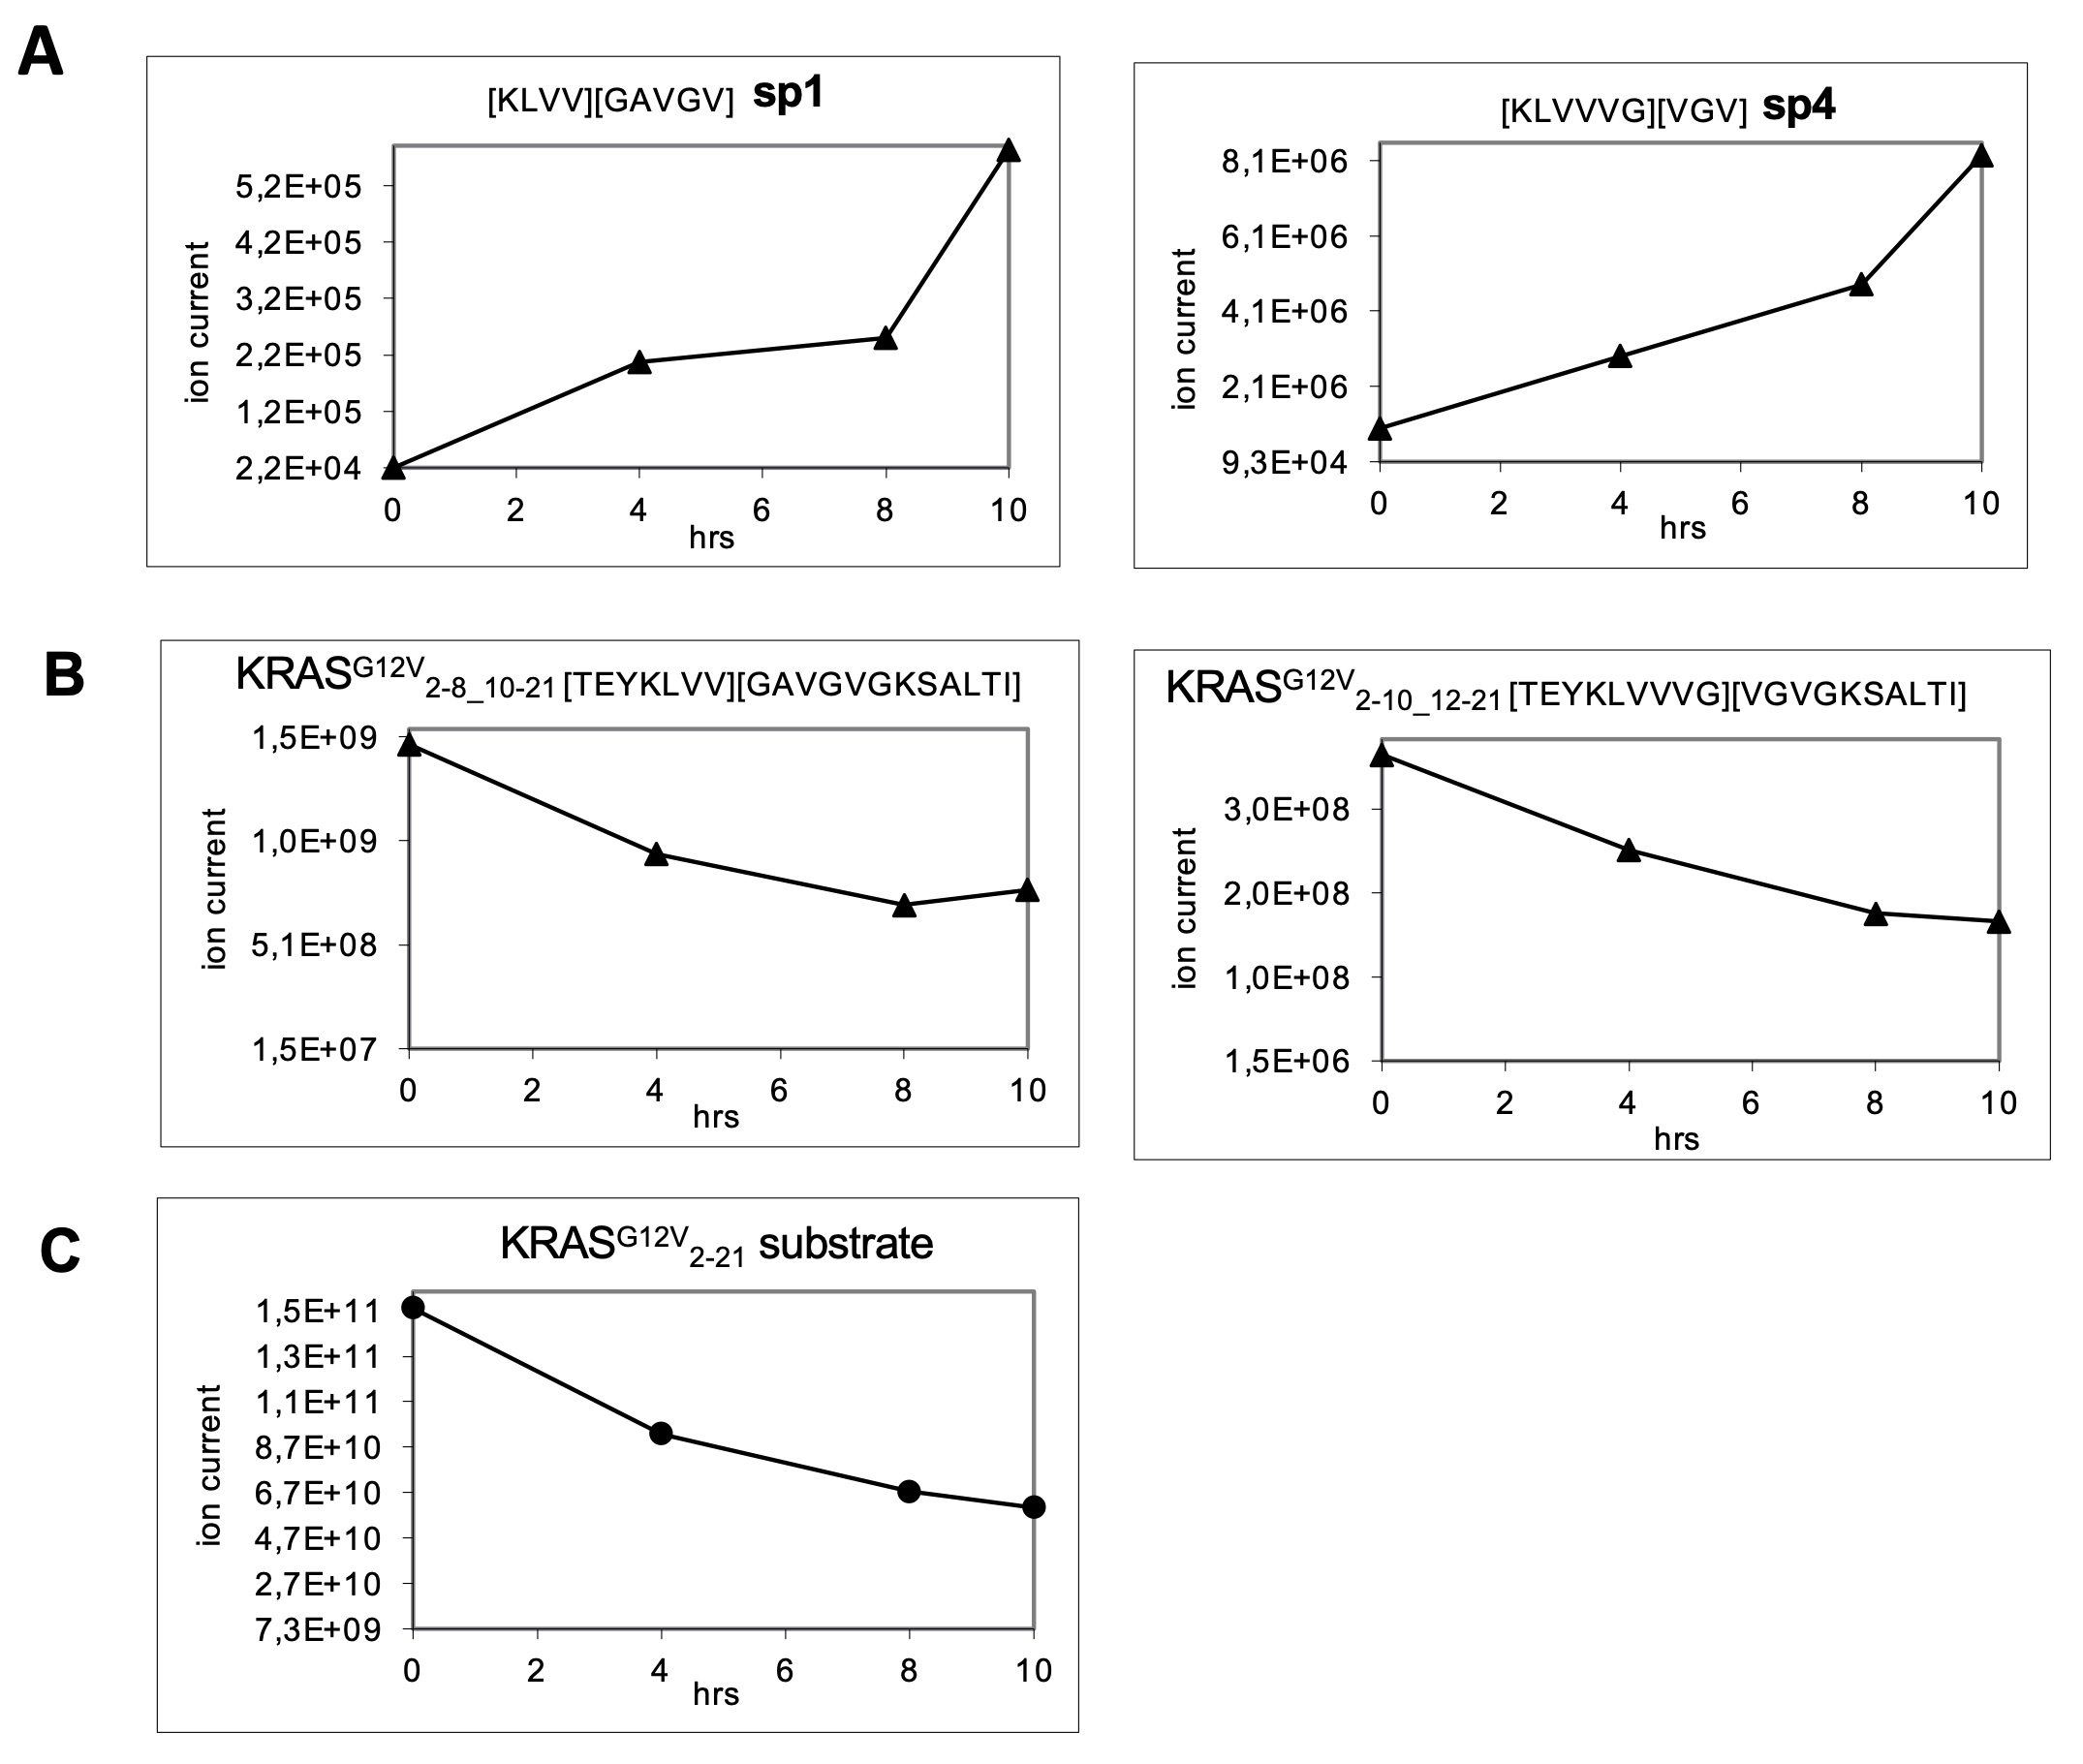

Supplement: supp [file elife-62019-supp-v2.zip › elife_poa_e62019_Figure_3_figure_supplement_5.jpg]

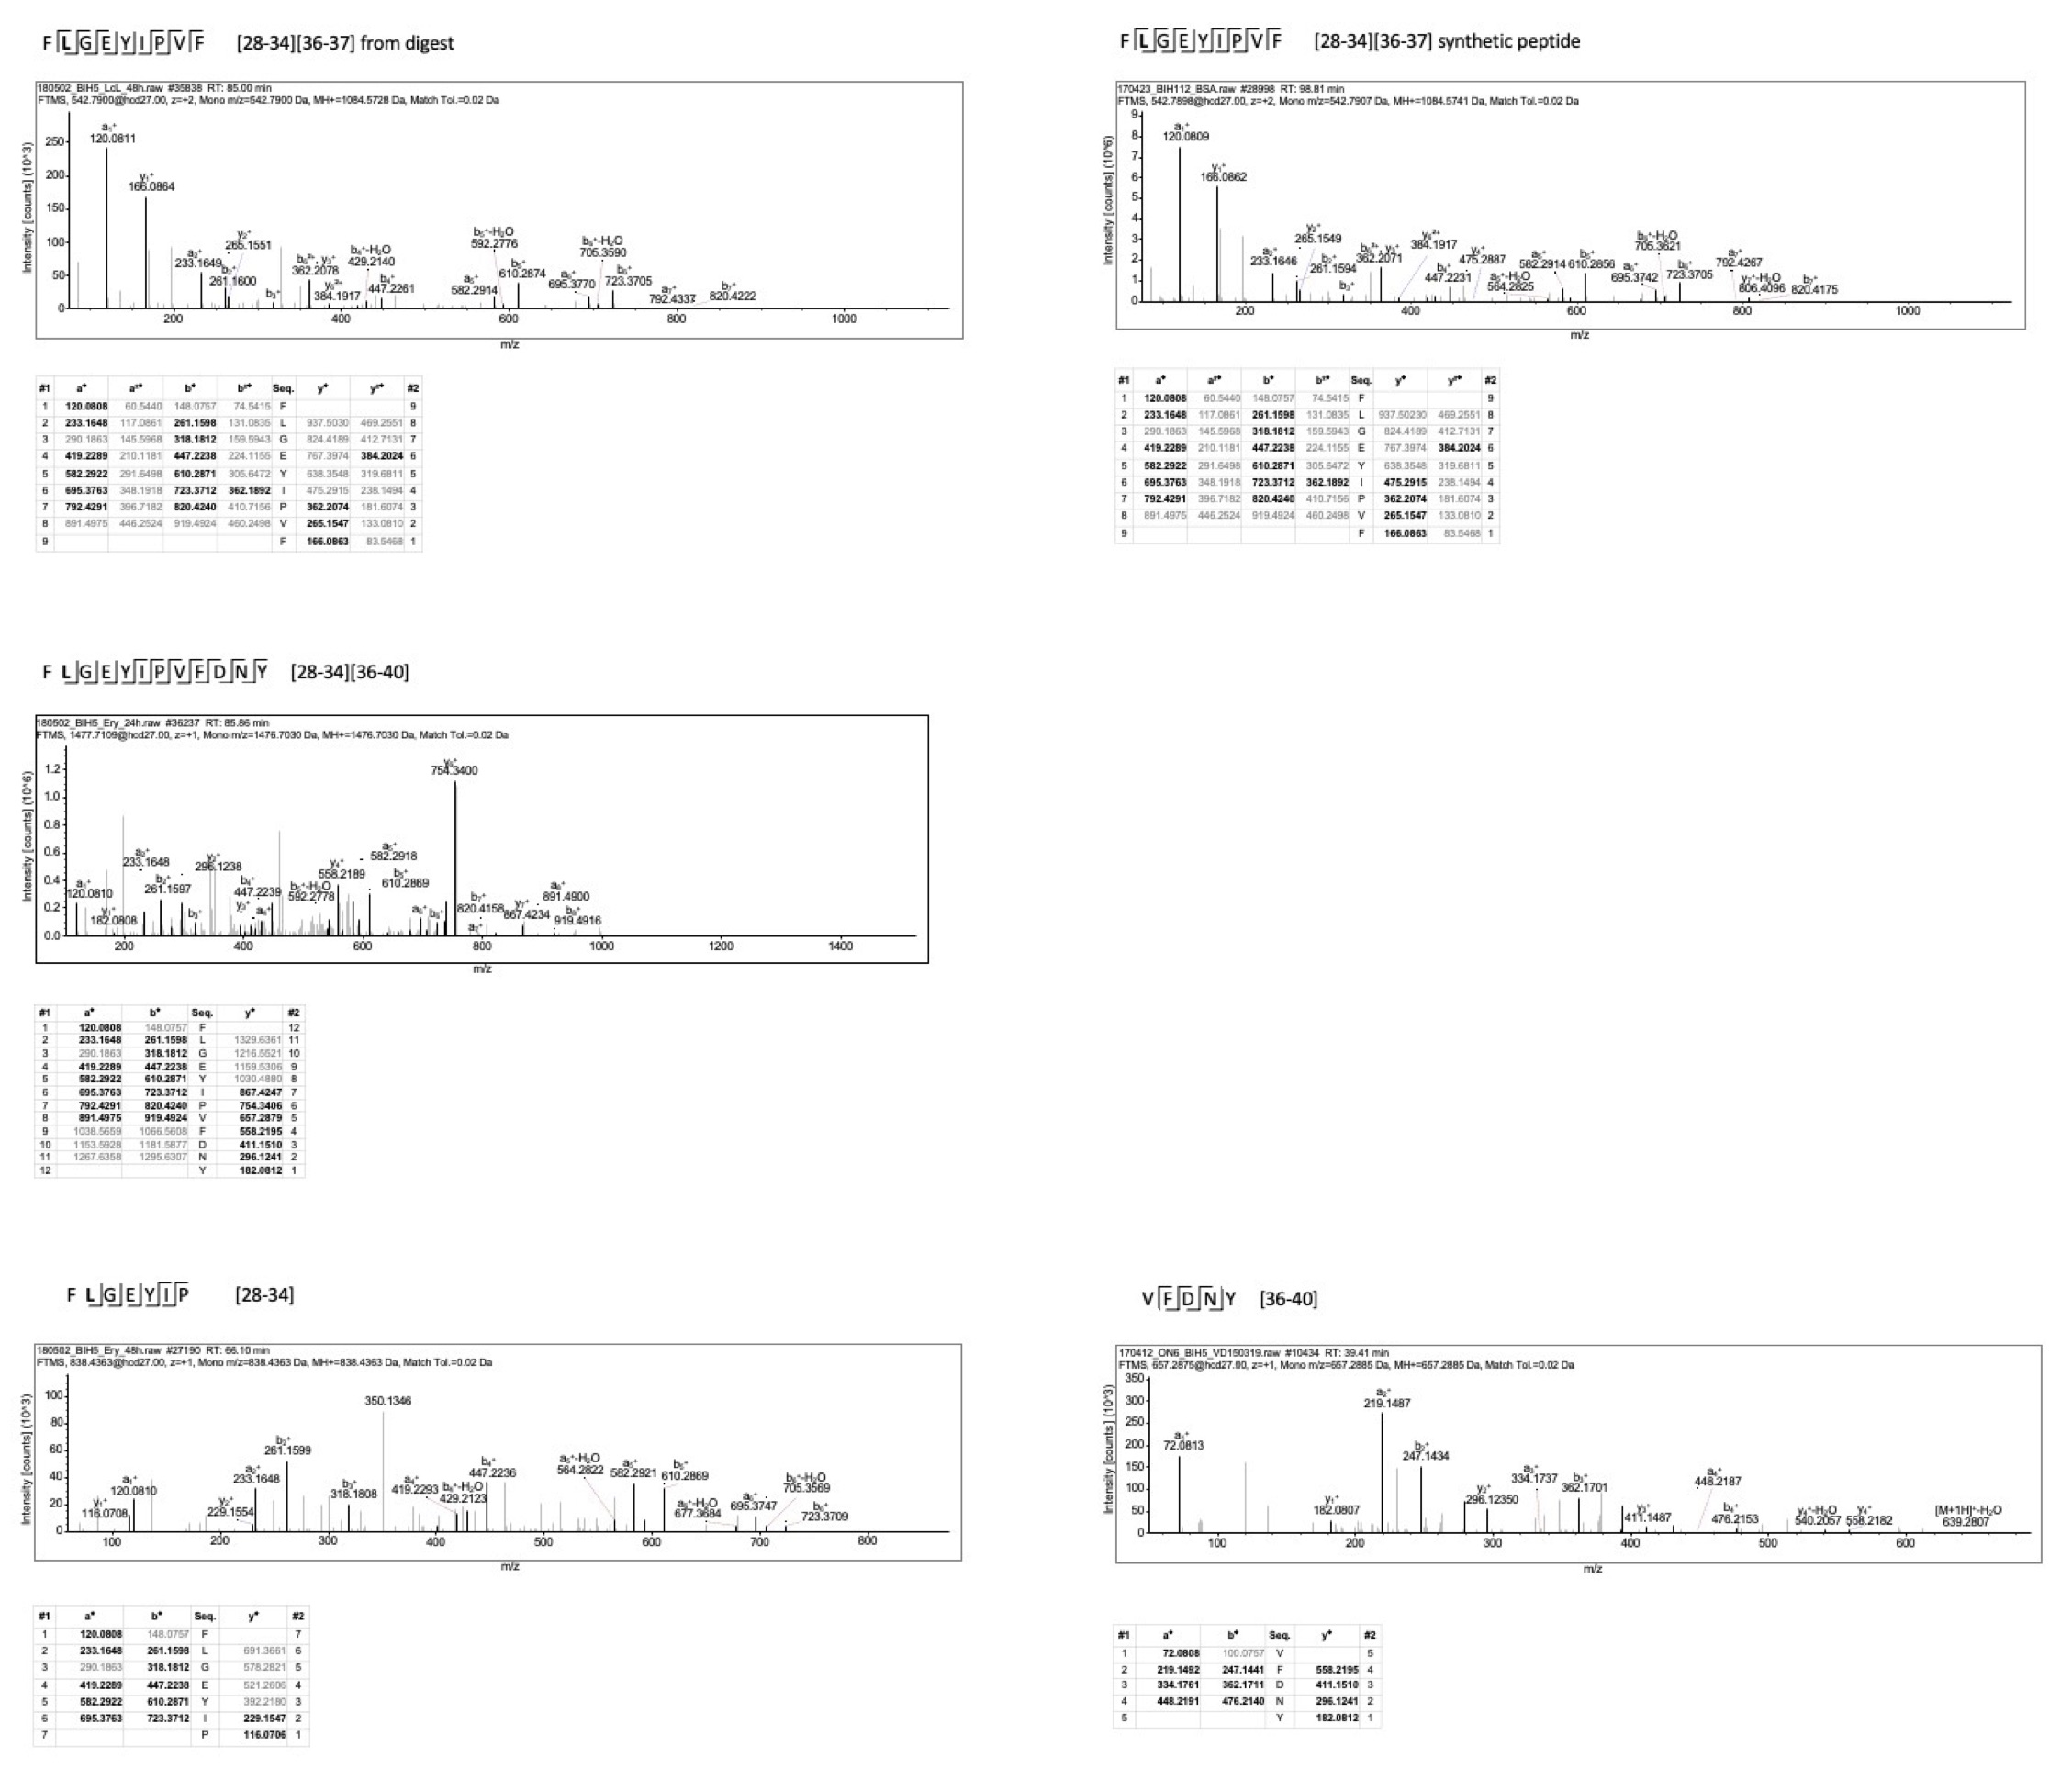

Supplement: supp [file elife-62019-supp-v2.zip › elife_poa_e62019_Figure_4_figure_supplement_1.jpg]
